# Supplementary material
Source: PubMed Central journal article supplement (PMC2928134)
Supplement: ddq281_1.pdf [file ddq281_1.pdf]

**Table S1.** Characteristics of study subjects

|                   | Stage I        | Stage II     | Combined       |
|-------------------|----------------|--------------|----------------|
| <i>N</i>          | 8,841          | 1,096        | 9,937          |
| Age, years        |                |              |                |
| mean±s.d.         | 52.21±8.92     | 48.35±15.68  | 51.78±9.97     |
| range             | 39–70          | 13–83        | 13–83          |
| Sex, <i>N</i>     |                |              |                |
| male (%)          | 4,182 (47.30%) | 426 (38.87%) | 4,608 (46.37%) |
| female (%)        | 4,659 (52.70%) | 670 (61.13%) | 5,329 (53.63%) |
| Bilirubin (mg/dL) |                |              |                |
| all               | 0.60±0.33      | 0.75±0.32    | 0.62±0.33      |
| male              | 0.70±0.38      | 0.80±0.34    | 0.71±0.38      |
| female            | 0.52±0.25      | 0.72±0.30    | 0.55±0.27      |
