# Supplementary material
Source: PubMed Central journal article supplement (PMC2928134)
Supplement: ddq281_2.pdf [file ddq281_2.pdf]

Table S3. Ethnic differences in major genetic variants associated with total serum bilirubin

| Gene             | SNP        | Location             | Korean |              |                         | CEU  |              | Sanna <i>et al</i>     | Johnson <i>et al</i>   |
|------------------|------------|----------------------|--------|--------------|-------------------------|------|--------------|------------------------|------------------------|
|                  |            |                      | MAF    | LD ( $r^2$ ) | $P$ (Stage I)           | MAF  | LD ( $r^2$ ) | $P$                    | $P$                    |
| <i>UGT1A1</i>    | rs11891311 | -30 kb               | 0.12   | ref          | $4.78 \times 10^{-148}$ | 0.31 | ref          | NA <sup>a</sup>        | $1.4 \times 10^{-235}$ |
|                  | rs887829   | -311 bp              | 0.12   | 0.96         | $5.37 \times 10^{-148}$ | 0.28 | 0.67         | $1.44 \times 10^{-69}$ | $5.0 \times 10^{-324}$ |
|                  | rs6742078  | Intron 1             | 0.12   | 0.96         | $7.19 \times 10^{-148}$ | 0.28 | 0.67         | NA                     | $5.0 \times 10^{-324}$ |
|                  | rs4148323  | Exon 1<br>(G71R; *6) | 0.19   | 0.032        | $2.56 \times 10^{-70}$  | 0    | -            | NA                     | NA                     |
| <i>SLCO1B3</i>   | rs2417940  | Intron 7             | 0.21   | ref          | $1.03 \times 10^{-17}$  | 0.13 | ref          | NS <sup>b</sup>        | NA                     |
|                  | rs2117032  | Near-3'              | 0.44   | 0.28         | $2.76 \times 10^{-5}$   | 0.37 | 0.073        | $2.91 \times 10^{-14}$ | $1.30 \times 10^{-6}$  |
|                  | rs17680137 | Intron 7             | 0.0037 | 0            | NA                      | 0.19 | 0.031        | $4.41 \times 10^{-14}$ | $1.20 \times 10^{-6}$  |
| <i>SLCO1B1</i>   | rs4149056  | Exon 5<br>(V177A)    | 0.13   | 0.137        | NA                      | 0.16 | 0.08         | 0.0015                 | $6.7 \times 10^{-13}$  |
| <i>LST-3TM12</i> | rs2417873  | Near-5'              | 0.15   | 0.085        | NA                      | 0.72 | 0.041        | NA                     | $1.5 \times 10^{-9}$   |
| <i>SLCO1A2</i>   | rs4149000  | Intron 9             | 0.11   | 0.098        | 0.013                   | 0.16 | 0.016        | NA                     | $2.8 \times 10^{-8}$   |

<sup>a</sup>NA: Not available

<sup>b</sup>NS: Not significant
