# Supplementary material
Source: PubMed Central journal article supplement (PMC2928134)
Supplement: ddq281_3.pdf [file ddq281_3.pdf]

Table S6. A table showing SNP marker filtering procedure

| Filtering steps                                                   | Number of SNP Markers |
|-------------------------------------------------------------------|-----------------------|
| Imputation                                                        | 2,100,739             |
| Minor allele frequency $\geq 1\%$                                 | 1,825,048             |
| Imputation quality (PLINK information content metric $\geq 0.8$ ) | 1,227,049             |
